# Supplementary material for: Translation, cross-cultural adaptation and validation of the General Movement checklist
Source: Research Square preprint supplement (doi:10.21203/rs.3.rs-4109507/v1), 2024-03-19
Supplement: Supplementary file 1 [file e6a9a5631c26f2a55a4a0425.docx]

*VERSIÓN EN ESPAÑOL.*

*LISTA DE VERIFICACIÓN DE MOVIMIENTOS GENERALES - EDAD PRETÉRMINO*

Nombre: Registro (núm. de ID).

Fecha de nacimiento: / / Edad: Edad gestacional: Fecha de las 40 semanas cumplidas de edad postmenstrual: / /

Nombre de la madre:

| Lactantes por calificar hasta las 37 semanas de edad postmenstrual | Fecha: | | Fecha: | | Fecha: | |
| --- | --- | --- | --- | --- | --- | --- |
| **Edad:** | | **Edad:** | | **Edad:** | |
| **SÍ** | **NO** | **SÍ** | **NO** | **SÍ** | **NO** |
| 1. Los movimientos consisten en rotaciones superpuestas a extensiones y flexiones de extremidades superiores e inferiores. |  |  |  |  |  |  |
| 2. Los movimientos ocurren en todo el espacio disponible. |  |  |  |  |  |  |
| 3. La dirección de los movimientos es variable |  |  |  |  |  |  |
| 4. La secuencia de movimientos varía constantemente y es impredecible. |  |  |  |  |  |  |
| 5. En particular, las extremidades inferiores se mueven con gran amplitud. |  |  |  |  |  |  |
| 6. Los movimientos de las extremidades inferiores son más evidentes que los de las extremidades superiores. |  |  |  |  |  |  |
| 7. La velocidad de los movimientos es más alta que la que sería en los niños a término. |  |  |  |  |  |  |
| 8. Los movimientos se inician en una parte del cuerpo y se propagan a otras partes como una ola de movimiento. |  |  |  |  |  |  |
| 9. Las secuencias inician y terminan gradualmente. |  |  |  |  |  |  |
| **En conclusión, ¿considera usted que estos movimientos generales (MG) son normales?** |  |  |  |  |  |  |

| Movimientos atípicos desde el periodo pretérmino hasta las 37 semanas de edad postmenstrual | Fecha: | | Fecha: | | Fecha: | |
| --- | --- | --- | --- | --- | --- | --- |
| **Edad:** | | **Edad:** | | **Edad:** | |
| **SÍ** | **NO** | **SÍ** | **NO** | **SÍ** | **NO** |
| 10. La fluencia está ausente. |  |  |  |  |  |  |
| 11. La secuencia es monótona. |  |  |  |  |  |  |
| 12. Los movimientos parecen ser repetitivos. |  |  |  |  |  |  |
| 13. La secuencia se interrumpe repentinamente. |  |  |  |  |  |  |
| 14. La secuencia es demasiado corta. |  |  |  |  |  |  |
| 15. Hay falta de rotaciones. |  |  |  |  |  |  |
| 16. La velocidad parece ser demasiado lenta. |  |  |  |  |  |  |
| 17. La cantidad de movimientos generales parece ser reducida. |  |  |  |  |  |  |
| 18. Los movimientos son demasiado rígidos. |  |  |  |  |  |  |
| 19. Los movimientos son abruptos. |  |  |  |  |  |  |
| 20. Los músculos de extremidades y tronco parecen contraerse simultáneamente y luego relajarse simultáneamente (patrón de encendido/apagado). |  |  |  |  |  |  |
| 21. La postura parece ser rígida. |  |  |  |  |  |  |
| 22. El niño parece estar conteniendo la respiración debido a contracciones de mayor duración del tronco, seguidas de un incremento en la frecuencia respiratoria. |  |  |  |  |  |  |
| 23. Los movimientos rígidos-sincronizados son más evidentes en las extremidades inferiores. |  |  |  |  |  |  |
| 24. La amplitud de los movimientos es significativamente elevada. |  |  |  |  |  |  |
| 25. Los movimientos son muy rápidos y abruptos. |  |  |  |  |  |  |
| 26. Los movimientos temblorosos son frecuentes. |  |  |  |  |  |  |
| **En conclusión, ¿qué patrón de movimientos generales atípico asignaría: pobre repertorio, rígido-sincronizado o caótico?** |  |  |  |  |  |  |

*LISTA DE VERIFICACIÓN DE MOVIMIENTOS GENERALES - EDAD A TÉRMINO*

Nombre: Registro (núm. de ID).

Fecha de nacimiento: / / Edad: Edad gestacional: Fecha de las 40 semanas cumplidas de edad postmenstrual: / /

Nombre de la madre:

| Lactantes por calificar desde la edad de término (37 a 40 semanas de edad postmenstrual) hasta las 5 semanas de edad postérmino (movimientos writhing) | Fecha: | | Fecha: | | Fecha: | |
| --- | --- | --- | --- | --- | --- | --- |
| **Edad:** | | **Edad:** | | **Edad:** | |
| **SÍ** | **NO** | **SÍ** | **NO** | **SÍ** | **NO** |
| 1. Los movimientos consisten en rotaciones superpuestas a extensiones y flexiones de extremidades superiores e inferiores. |  |  |  |  |  |  |
| 2. Los movimientos ocurren en todo el espacio disponible. |  |  |  |  |  |  |
| 3. La dirección de los movimientos es variable |  |  |  |  |  |  |
| 4. La secuencia de movimientos varía constantemente y es impredecible. |  |  |  |  |  |  |
| 5. En comparación con la edad pretérmino, la amplitud es menor. |  |  |  |  |  |  |
| 6. Los movimientos elípticos son más evidentes en las extremidades superiores. |  |  |  |  |  |  |
| 7. La velocidad es moderada. |  |  |  |  |  |  |
| 8. Los movimientos se inician en una parte del cuerpo y se propagan a otras partes como una ola de movimiento. |  |  |  |  |  |  |
| 9. Las secuencias inician y terminan gradualmente. |  |  |  |  |  |  |
| **En conclusión, ¿considera usted que estos movimientos generales (MG) son normales?** |  |  |  |  |  |  |

| Movimientos atípicos desde la edad de término hasta las 5 semanas de edad postérmino (movimientos writhing) | Fecha: | | Fecha: | | Fecha: | |
| --- | --- | --- | --- | --- | --- | --- |
| **Edad:** | | **Edad:** | | **Edad:** | |
| **SÍ** | **NO** | **SÍ** | **NO** | **SÍ** | **NO** |
| 10. La fluencia está ausente. |  |  |  |  |  |  |
| 11. La secuencia es monótona. |  |  |  |  |  |  |
| 12. Los movimientos parecen ser repetitivos. |  |  |  |  |  |  |
| 13. La secuencia se interrumpe repentinamente. |  |  |  |  |  |  |
| 14. La secuencia es demasiado corta. |  |  |  |  |  |  |
| 15. Hay falta de rotaciones. |  |  |  |  |  |  |
| 16. La velocidad parece ser demasiado lenta. |  |  |  |  |  |  |
| 17. La cantidad de movimientos generales parece ser reducida. |  |  |  |  |  |  |
| 18. Los movimientos son demasiado rígidos. |  |  |  |  |  |  |
| 19. Los movimientos son abruptos. |  |  |  |  |  |  |
| 20. Los músculos de extremidades y tronco parecen contraerse simultáneamente y luego relajarse simultáneamente (patrón de encendido/apagado). |  |  |  |  |  |  |
| 21. La postura parece ser rígida. |  |  |  |  |  |  |
| 22. El niño parece estar conteniendo la respiración debido a contracciones de mayor duración del tronco, seguidas de un incremento en la frecuencia respiratoria. |  |  |  |  |  |  |
| 23. Los movimientos rígidos-sincronizados son más evidentes en las extremidades inferiores. |  |  |  |  |  |  |
| 24. La amplitud de los movimientos es significativamente elevada. |  |  |  |  |  |  |
| 25. Los movimientos son muy rápidos y abruptos. |  |  |  |  |  |  |
| 26. Los movimientos temblorosos son frecuentes. |  |  |  |  |  |  |
| **En conclusión, ¿qué patrón de movimientos generales atípico asignaría: pobre repertorio, rígido-sincronizado o caótico?** |  |  |  |  |  |  |
